# Supplementary material
Source: PubMed Central journal article supplement (PMC4100784)
Supplement: bi500491w_si_001.pdf [file bi500491w_si_001.pdf]

1  
2  
3  
4  
5  
6  
7  
8  
9  
10  
11  
12  
13  
14  
15  
16  
17  
18  
19  
20  
21  
22  
23  
24  
25  
26

**Supplementary Information**

Novel human butyrylcholinesterase variants: toward organophosphonate detoxication

Mary Dwyer, Sacha Javor, Daniel A. Ryan, Emily M. Smith, Jun Zhang, John R. Cashman\*

\*Corresponding Author: John R. Cashman, Human BioMolecular Research Institute, 5310 Eastgate Mall, San Diego CA 92121, Phone: (858) 458-9305, Email: [JCashman@hbri.org](mailto:JCashman@hbri.org)

1

2 **Table S1.**

| <b>Primer</b>     | <b>Primer Sequence</b>                              |
|-------------------|-----------------------------------------------------|
| hBChE.332S.F      | 5'-GCTTTTTTAGTCAGCGGTGCTCCTGGC-3'                   |
| hBChE.332S.R      | 5'-GCCAGGAGCACCGCTGACTAAAAAAGC-3'                   |
| hBChE.340H.F      | 5'-GGCTTCAGCAAACACAACAATAGTATC-3'                   |
| hBChE.340H.R      | 5'-GATACTATTGTTGTGTTTGCTGAAGCC-3'                   |
| hBChE.332S.340H.F | 5'-GCTTTTTTAGTCAGCGGTGCTCCTGGCTTCAGCAAACACAACAAT-3' |
| hBChE.332S.340H.R | 5'-ACTATTGTTGTGTTTGCTGAAAGGAGCACCGCTGACTAAAAAAGC-3' |

3

4

5

6

7

8

9

10

11

12

13

14

15

16

17

18

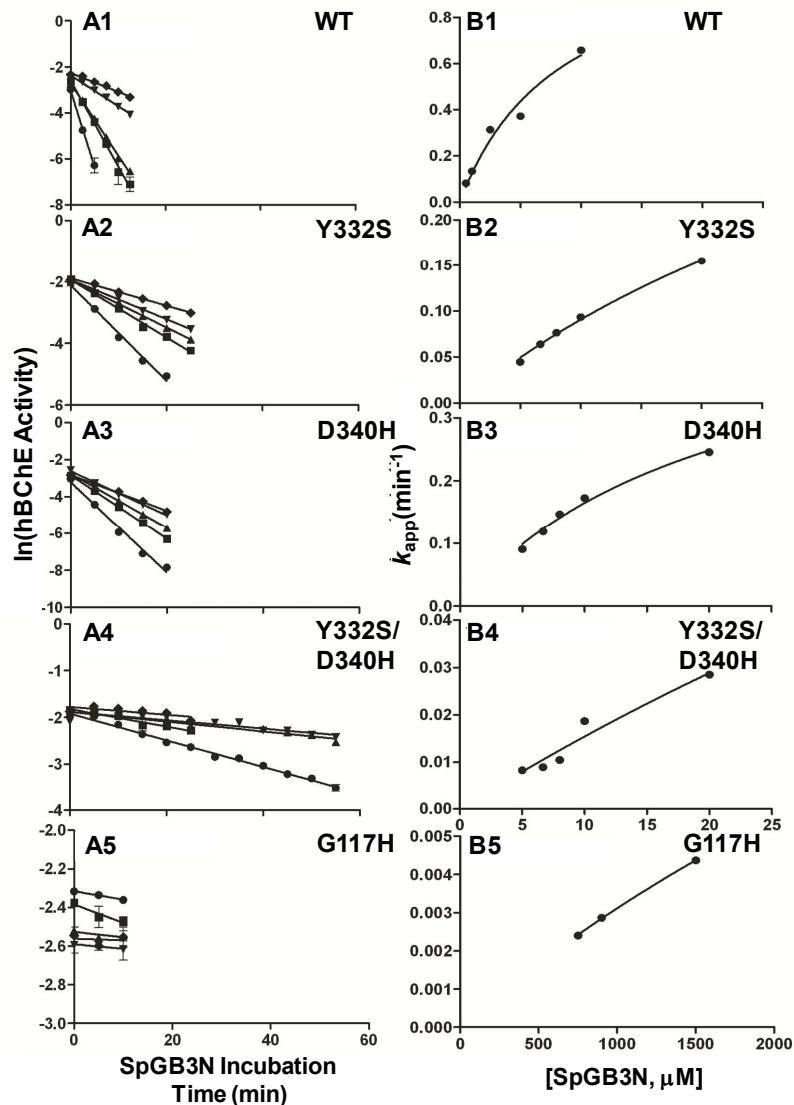

1  
 2 **Figure S1. (A)** Plots of residual hBChE activity versus incubation time with  $S_p\text{GB3N}$ : WT (A1)  
 3 and Y332S (A2), D340H (A3), Y332S/D340H (A4) and G117H (A5) variant hBChE inhibition  
 4 by  $S_p\text{GB3N}$ . WT and variant hBChE was incubated with a concentrations of  $S_p\text{GB3N}$  (i.e.,  $\blacklozenge$ 0.5  
 5  $\mu\text{M}$ ,  $\blacktriangledown$ 1  $\mu\text{M}$ ,  $\blacktriangle$ 2.5  $\mu\text{M}$ ,  $\blacksquare$ 5  $\mu\text{M}$ ,  $\bullet$ 10  $\mu\text{M}$   $S_p\text{GB3N}$  for WT,  $\blacklozenge$ 5  $\mu\text{M}$ ,  $\blacktriangledown$ 6.67  $\mu\text{M}$ ,  $\blacktriangle$ 8  $\mu\text{M}$ ,  $\blacksquare$ 10  
 6  $\mu\text{M}$ ,  $\bullet$ 20  $\mu\text{M}$   $S_p\text{GB3N}$  for Y332S, D340H, and Y332S/D340H,  $\blacklozenge$ 500  $\mu\text{M}$ ,  $\blacktriangledown$ 750  $\mu\text{M}$ ,  $\blacktriangle$ 900  $\mu\text{M}$ ,  
 7  $\blacksquare$ 1000  $\mu\text{M}$ ,  $\bullet$ 1500  $\mu\text{M}$   $S_p\text{GB3N}$  for G117H) for the indicated period of time. The percent  
 8 remaining activity post-inhibition was determined by the Ellman assay. The natural log of  
 9 activity was plotted as a function of the duration of enzyme inhibition versus inhibitor  
 10 concentration and fit to a linear regression line. The best-fit slope values defined the apparent  
 11 rate constants  $k_{\text{app}}$ . **(B)** Replot of  $k_{\text{app}}$  versus inhibitor concentration for the incubations of WT  
 12 (B1), Y332S (B2), D340H (B3), Y332S/D340H (B4) and G117H (B5) in the presence of  
 13  $S_p\text{GB3N}$ . The best-fit  $k_{\text{app}}$  values were derived from slopes of linear regression analysis as shown  
 14 in (A). Data were fit to the equation of  $k_{\text{app}} = k_2[S_p\text{GB3N}]/(K_D + [S_p\text{GB3N}])$ .

15

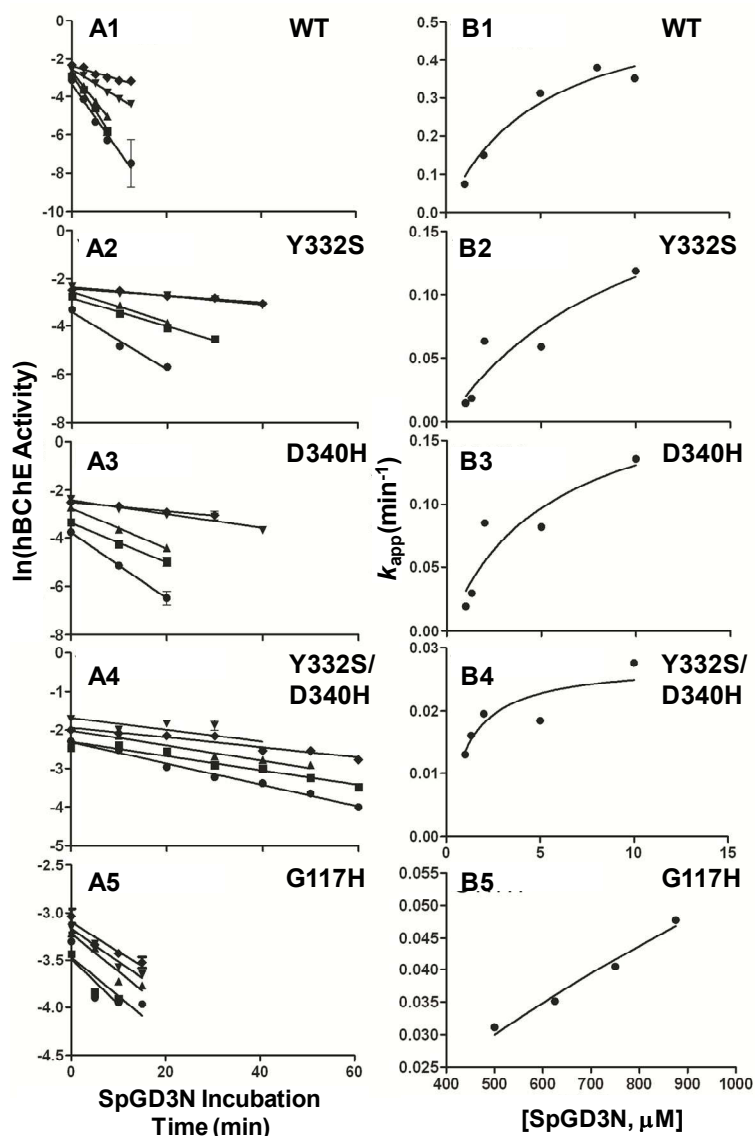

1  
2 **Figure S2. (A)** Plots of residual hBChE activity versus incubation time with  $S_p$ GD3N: WT (A1)  
3 and Y332S (A2), D340H (A3), Y332S/D340H (A4), and G117H (A5) variant hBChE inhibition  
4 by  $S_p$ GD3N. WT and variant hBChE was incubated with a concentration range of  $S_p$ GD3N (i.e.,  
5  $\blacklozenge$  1  $\mu\text{M}$ ,  $\blacktriangledown$  2  $\mu\text{M}$ ,  $\blacktriangle$  5  $\mu\text{M}$ ,  $\blacksquare$  8  $\mu\text{M}$ ,  $\bullet$  10  $\mu\text{M}$   $S_p$ GD3N for WT,  $\blacklozenge$  1  $\mu\text{M}$ ,  $\blacktriangledown$  1.33  $\mu\text{M}$ ,  $\blacktriangle$  2  $\mu\text{M}$ ,  $\blacksquare$  5  
6  $\mu\text{M}$ ,  $\bullet$  10  $\mu\text{M}$   $S_p$ GD3N for Y332S, D340H, and Y332S/D340H,  $\blacklozenge$  500  $\mu\text{M}$ ,  $\blacktriangledown$  625  $\mu\text{M}$ ,  $\blacktriangle$  750  
7  $\mu\text{M}$ ,  $\blacksquare$  875  $\mu\text{M}$ ,  $\bullet$  1000  $\mu\text{M}$   $S_p$ GD3N for G117H) for the indicated period of time. The percent  
8 remaining activity post-inhibition was determined by the Ellman assay. The natural log of the  
9 activity was plotted as a function of the duration of enzyme inhibition versus inhibitor  
10 concentration and fit to a linear regression line. The best-fit slope values defined the apparent  
11 rate constants  $k_{\text{app}}$ . **(B)** Replot of  $k_{\text{app}}$  versus inhibitor concentration for the incubations of WT  
12 (B1), Y332S (B2), D340H (B3), Y332S/D340H (B4) and G117H (B5) with  $S_p$ GD3N. The best-  
13 fit  $k_{\text{app}}$  values were derived from slopes of linear regression analysis as shown in (A). Data were  
14 fit to the equation of  $k_{\text{app}} = k_2[\text{SpGD3N}]/(K_D + [\text{SpGD3N}])$ .

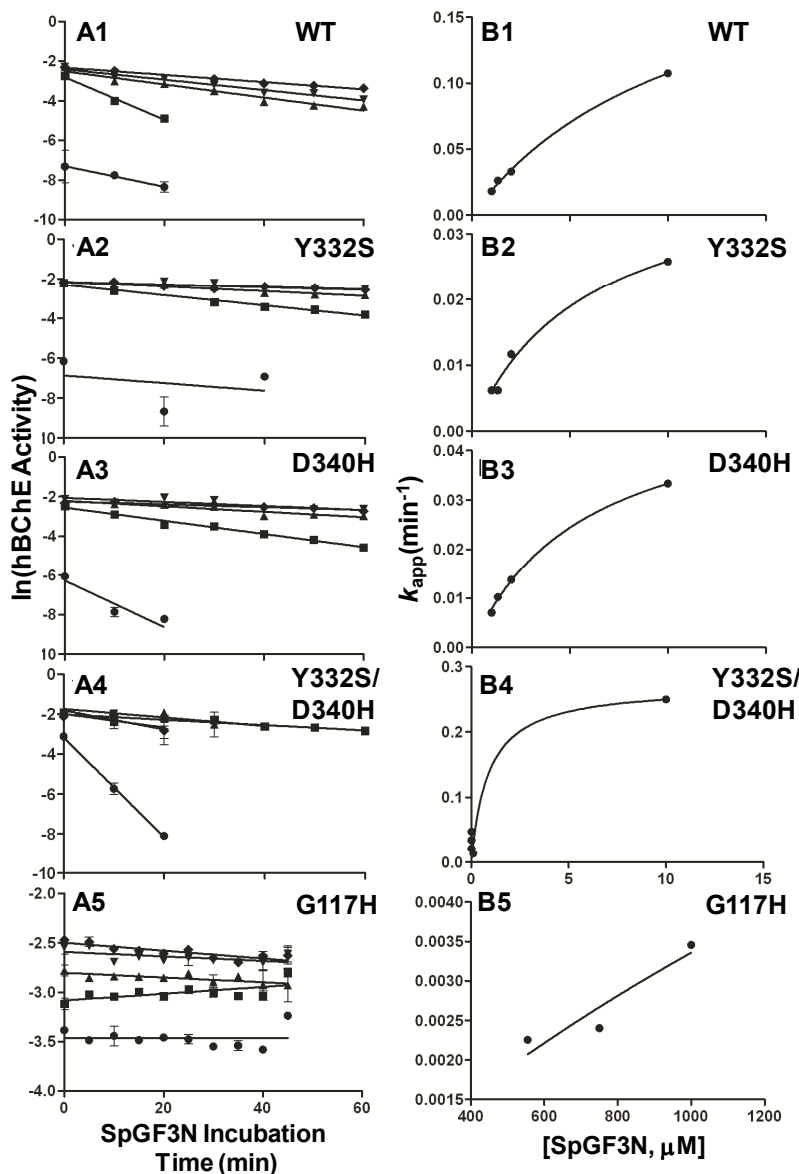

1  
2 **Figure S3. (A)** Plots of residual hBChE activity versus incubation time with  $S_p$ GF3N: WT (**A1**)  
3 and Y332S (**A2**), D340H (**A3**), Y332S/D340H (**A4**), and G117H (**A5**) variant hBChE inhibition  
4 by  $S_p$ GF3N. WT and variant hBChE were incubated with a diverse concentration range of  
5  $S_p$ GF3N (i.e.,  $\blacklozenge$ 0.01  $\mu$ M,  $\blacktriangledown$ 0.0133  $\mu$ M,  $\blacktriangle$ 0.02  $\mu$ M,  $\blacksquare$ 0.1  $\mu$ M,  $\bullet$ 10  $\mu$ M  $S_p$ GF3N for WT, Y332S,  
6 D340H, Y332S/D340H,  $\blacklozenge$ 500  $\mu$ M,  $\blacktriangledown$ 555  $\mu$ M,  $\blacktriangle$ 750  $\mu$ M,  $\blacksquare$ 1000  $\mu$ M,  $\bullet$ 2000  $\mu$ M  $S_p$ GF3N for  
7 G117H) for the indicated period of time. The percent remaining activity post-inhibition was  
8 determined by the Ellman assay. The natural log of the activity was plotted as a function of the  
9 duration of enzyme inhibition versus inhibitor concentration and fit to a linear regression line.  
10 The best-fit slope values defined the apparent rate constants  $k_{app}$ . **(B)** Replot of  $k_{app}$  versus  
11 inhibitor concentration for the incubations of WT (**B1**), Y332S (**B2**), D340H (**B3**),  
12 Y332S/D340H (**B4**) and G117H (**B5**) with  $S_p$ GF3N. The best-fit  $k_{app}$  values were derived from  
13 slopes of linear regression analysis as shown in (A). Data were fit to the equation of  $k_{app} =$   
14  $k_2[S_pGF3N]/(K_D + [S_pGF3N])$ .

1  
2  
3  
4  
5  
6  
7  
8  
9  
10  
11  
12  
13  
14  
15  
16  
17  
18

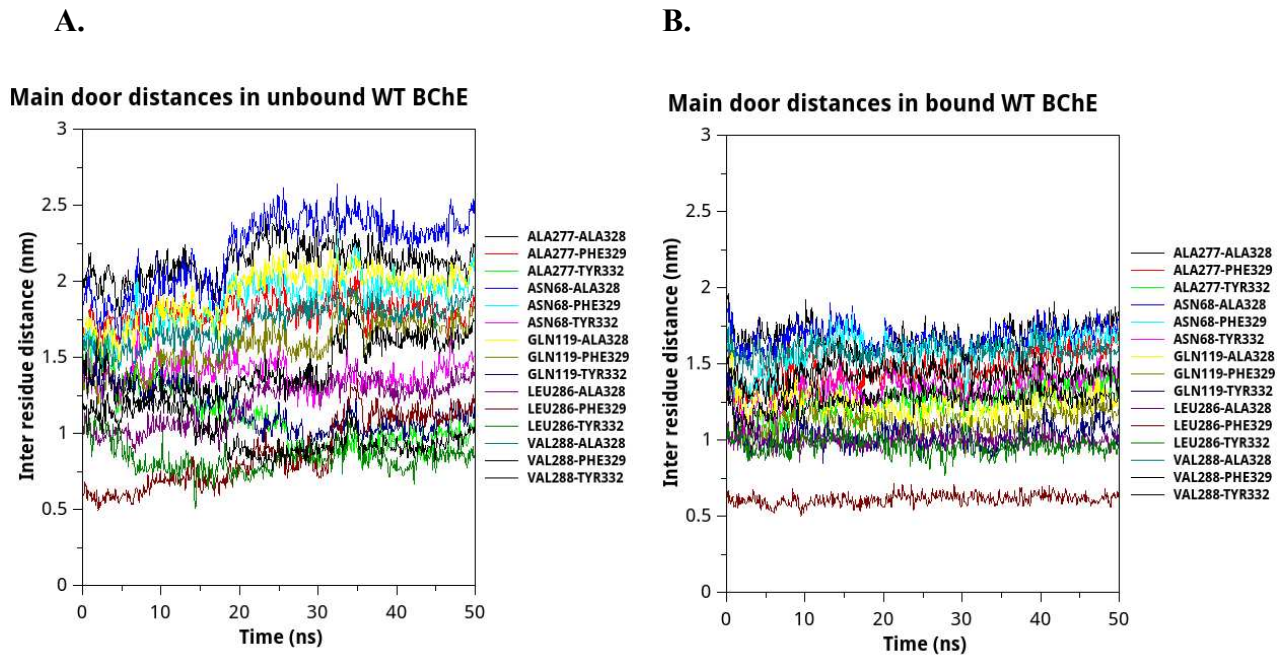

**Figure S4.** A plot of distance between the center of mass of pairs of residues (V288, Q119, L286, N68, A277 and A328, F329, Y332) on each side of hBChE “main door” as a function of time for molecular dynamics simulations of the WT hBChE in the presence or absence of *S<sub>p</sub>*GB3N bound to the active site.

1

2

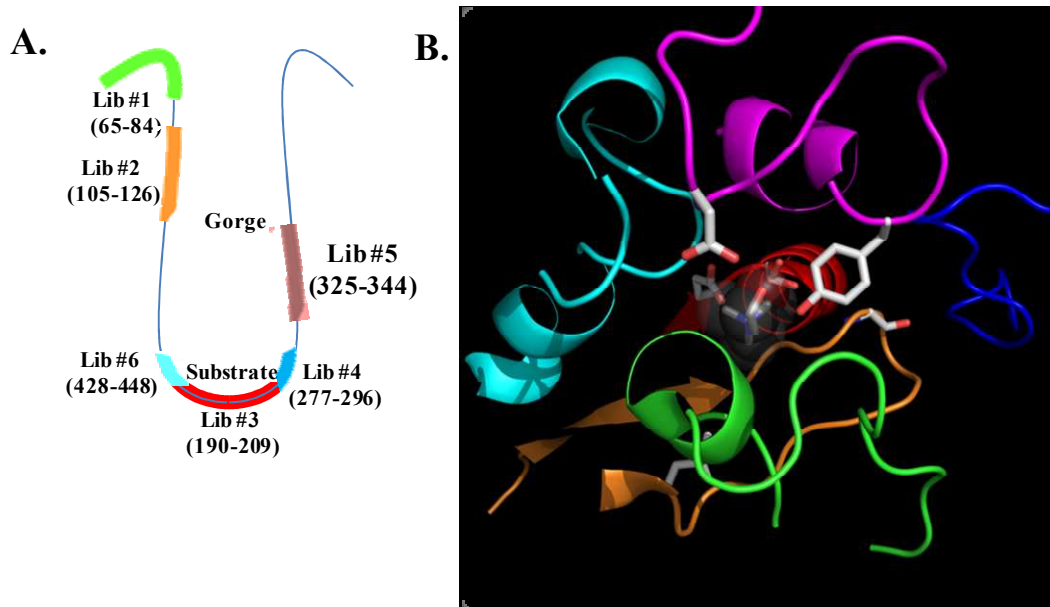

3

4 **Figure S5.**<sup>4</sup> Depiction of mutation libraries of hBChE. (A) Cartoon showing the active site of  
5 hBChE. Each color represents a corresponding peptide sequence that was constructed in  
6 individual libraries: green, library #1; orange, library #2; pink, library #3; blue, library #4;  
7 brown, library #5; aqua, library 6. (B) Three-dimensional view of the active site of hBChE.

8

9

- 10 4. Zhang, J., Chen, S., Ralph, E. C., Dwyer, M., and Cashman, J. R. (2012) Identification of  
11 human butyrylcholinesterase organophosphate-resistant variants through a novel  
12 mammalian enzyme functional screen, *J Pharmacol Exp Ther* 343, 673-682.

13

14
